# Supplementary material
Source: PubMed Central journal article supplement (PMC7398558)
Supplement: NIHMS1604835-supplement-2.pdf [file NIHMS1604835-supplement-2.pdf]

**Figure S1. Deployment of Recombinant Cas9-BirA\* and dCas9-BirA\* in HSS, Related to Figures 1 and 2**

(A) Coomassie of purified Cas9, dCas9, Cas9-BirA\*, and dCas9-BirA\*.

(B) BirA\* fusion does not compromise gRNA-targeting of Cas9 or Cas9's cleavage ability in vitro.

(C) BirA\* fusion does not impede energy-dependent removal of Cas9 from plasmid substrates in HSS.

(D) Proteins identified by mass spectrometry plotted according to average number of spectral counts in Cas9-BirA\*–on-target gRNA samples (N = 3 biological replicates) versus dCas9-BirA\*–on-target gRNA samples (N = 3 biological replicates).

(E) Immunodepletion of SSRP1 or SPT16 from HSS.

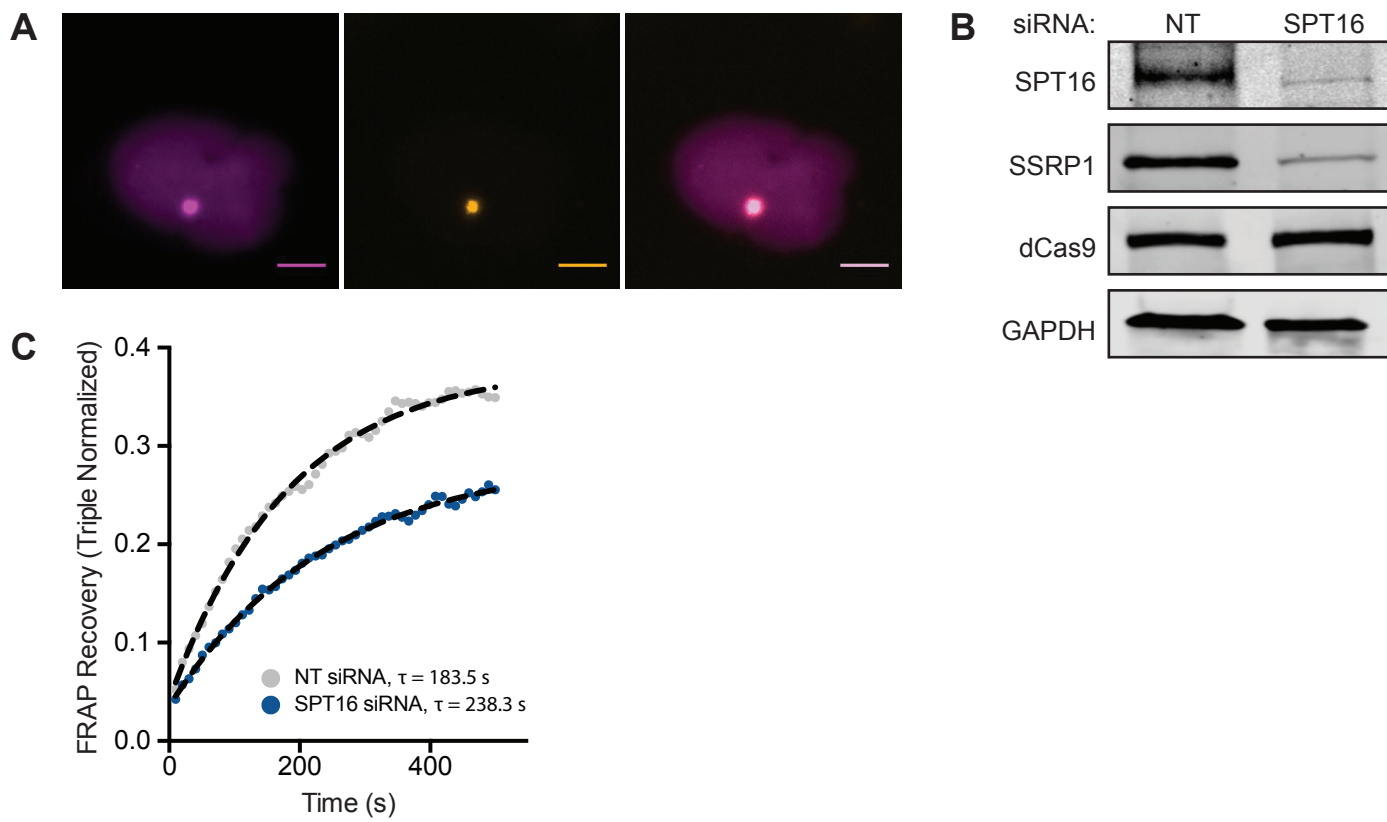

**Figure S2. FRAP Imaging of dCas9-HaloTag after FACT Depletion, Related to Figure 3**

(A) Colocalization of dCas9-HaloTag labeled with JF<sub>646</sub> and programmed with a tetO gRNA (left panel) and mOrange-LacI-NLS (middle panel) at synthetic arrays. The right panel is an overlay of the two channels. Scale bars = 10  $\mu$ m.

(B) Western blot of SPT16, SSRP1, dCas9, and GAPDH in U2OS cells transfected with either NT or SPT16 siRNAs.

(C) Mean FRAP recoveries with single component exponential fits.



**Figure S3. Effects of FACT Depletion and ssODN Inclusion on Cas9 Editing Outcomes, Related to Figure 4**

(A) Western blot of SPT16, SSRP1, dCas9, and GAPDH in K562 cells transfected with either NT or SPT16 siRNAs.

(B) Indel rates from amplicon-NGS sequencing of eight different loci after electroporation of Cas9 RNPs in the absence of an HDR donor (N = 3 biological replicates). Data are represented as mean  $\pm$  standard deviation.

(C) Total editing rates from amplicon-NGS sequencing of eight different loci after electroporation of Cas9 RNPs in the absence or presence of an HDR donor (N = 3 biological replicates). Data are represented as mean  $\pm$  standard deviation.

(D) Total editing rates from amplicon-NGS sequencing of eight different loci after electroporation of Cas9 RNPs in the presence of an HDR donor (N = 3 biological replicates). Data are represented as mean  $\pm$  standard deviation.

(E) Total editing rates from amplicon-NGS sequencing of *VEGFA* 0, 1, 2, 3, 6, 9, 12, and 24 hours after electroporation of Cas9 RNPs in the presence of an HDR donor (N = 3 biological replicates). Data are represented as mean  $\pm$  standard deviation.

(F) Representative alleles from cells edited with Cas9 programmed with the *VEGFA* gRNA and a PAM-out ssODN HDR donor.

(G) Histograms of indel distributions for *CD59* and *VEGFA* plotted by indel abundance (top) or indel size (bottom).

**A**

Coding Strand *CD25* gRNA  
 5' - CCTGGCTGAACACGCCAGCCCAA-46 bp - CACAAGGGT**GACAGCCCAGGCGG**-3'  
 3' - **GGA**CCGACTTGTGCGGGTCGGGTT-46 bp - GTGTTCCCACTGTTCGGGTCCGCC-5'  
 Non-Coding Strand *CD25* gRNA

**C**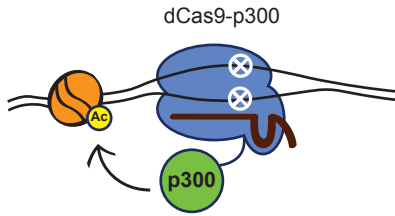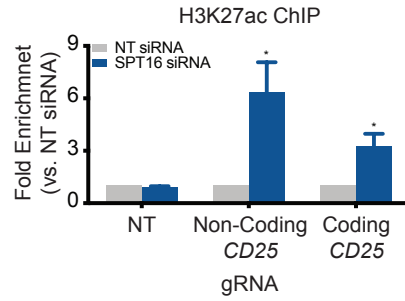**B**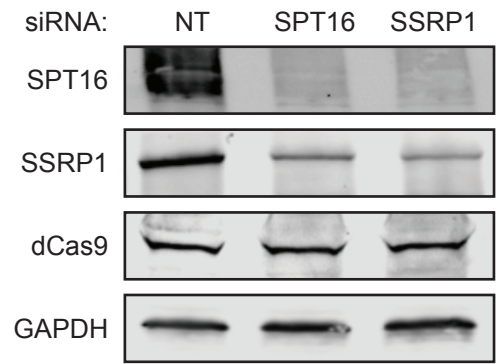**D**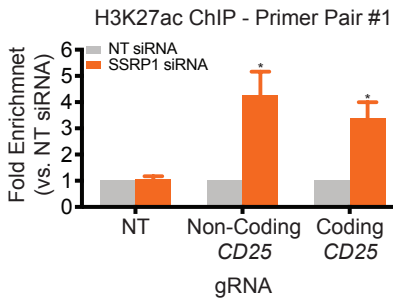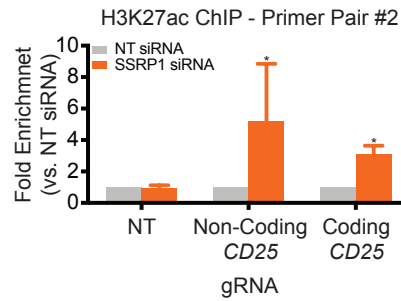**E**

Coding Strand *CD55* gRNA  
 5' - CCTAATGCCAGCCAGCTTTGGAT**TGG**-3'  
 3' - **GGA**TTACGGGTCGGTTCGAAACCTACC-5'  
 Non-Coding Strand *CD55* gRNA

**F**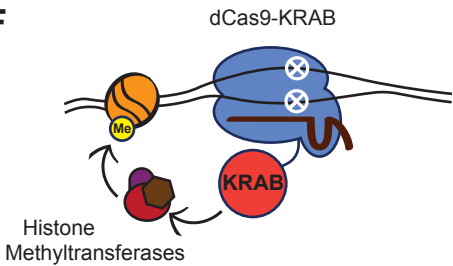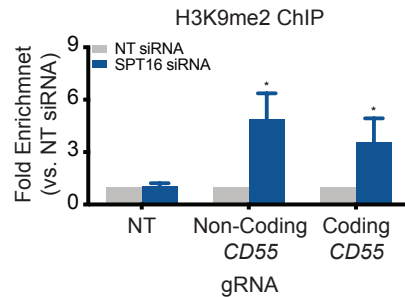**G**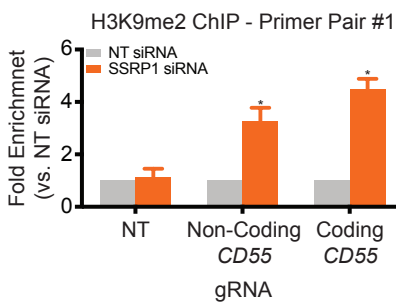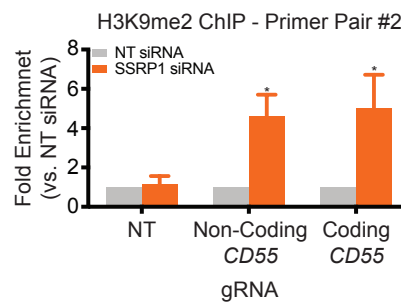

**Figure S4. FACT Depletion Enhances Chromatin Marking by dCas9-p300 and dCas9-KRAB, Related to Figure 5**

(A) Schematic of coding and non-coding strand CD25 gRNAs.

(B) Western blot of SPT16, SSRP1, dCas9, and GAPDH in HEK293T cells transfected with either NT, SPT16, or SSRP1 siRNAs.

(C) Knockdown of SPT16 increases H3K27 acetylation in HEK293T dCas9-p300 cells (N = 3 biological replicates). Fold enrichment is the amount of H3K27ac after SPT16 depletion normalized to the amount of H3K27ac after treatment with a NT siRNA. qPCR primers amplified regions that include the corresponding protospacer. Data are represented as mean  $\pm$  standard deviation.

(D) Knockdown of SSRP1 increases H3K27 acetylation in HEK293T dCas9-p300 cells (N = 3 biological replicates). Fold enrichment is the amount of H3K27ac after SSRP1 depletion normalized to the amount of H3K27ac after treatment with a NT siRNA. qPCR primers amplified regions 9 base pairs upstream of the non-coding-strand gRNA protospacer and 46 base pairs upstream of the coding strand gRNA protospacer (Primer Pair #1) or regions that include the corresponding protospacers (Primer Pair #2). Data are represented as mean  $\pm$  standard deviation.

(E) Schematic of coding and non-coding strand CD55 gRNAs.

(F) Knockdown of SPT16 increases H3K9 methylation in K562 dCas9-KRAB cells (N = 3 biological replicates). Fold enrichment is the amount of H3K9me2 after SPT16 depletion normalized to the amount of H3K9me2 after treatment with a NT siRNA. qPCR primers amplified a region that include the protospacers. Data are represented as mean  $\pm$  standard deviation.

(G) Knockdown of SSRP1 increases H3K9 methylation in K562 dCas9-KRAB cells (N = 3 biological replicates). Fold enrichment is the amount of H3K9me2 after SSRP1 depletion normalized to the amount of H3K9me2 after treatment with a NT siRNA. qPCR primers amplified a region 66 base pairs upstream of both the coding and non-coding strand gRNA protospacers (Primer Pair #1) or a region that includes the protospacers (Primer Pair #2). Data are represented as mean  $\pm$  standard deviation.

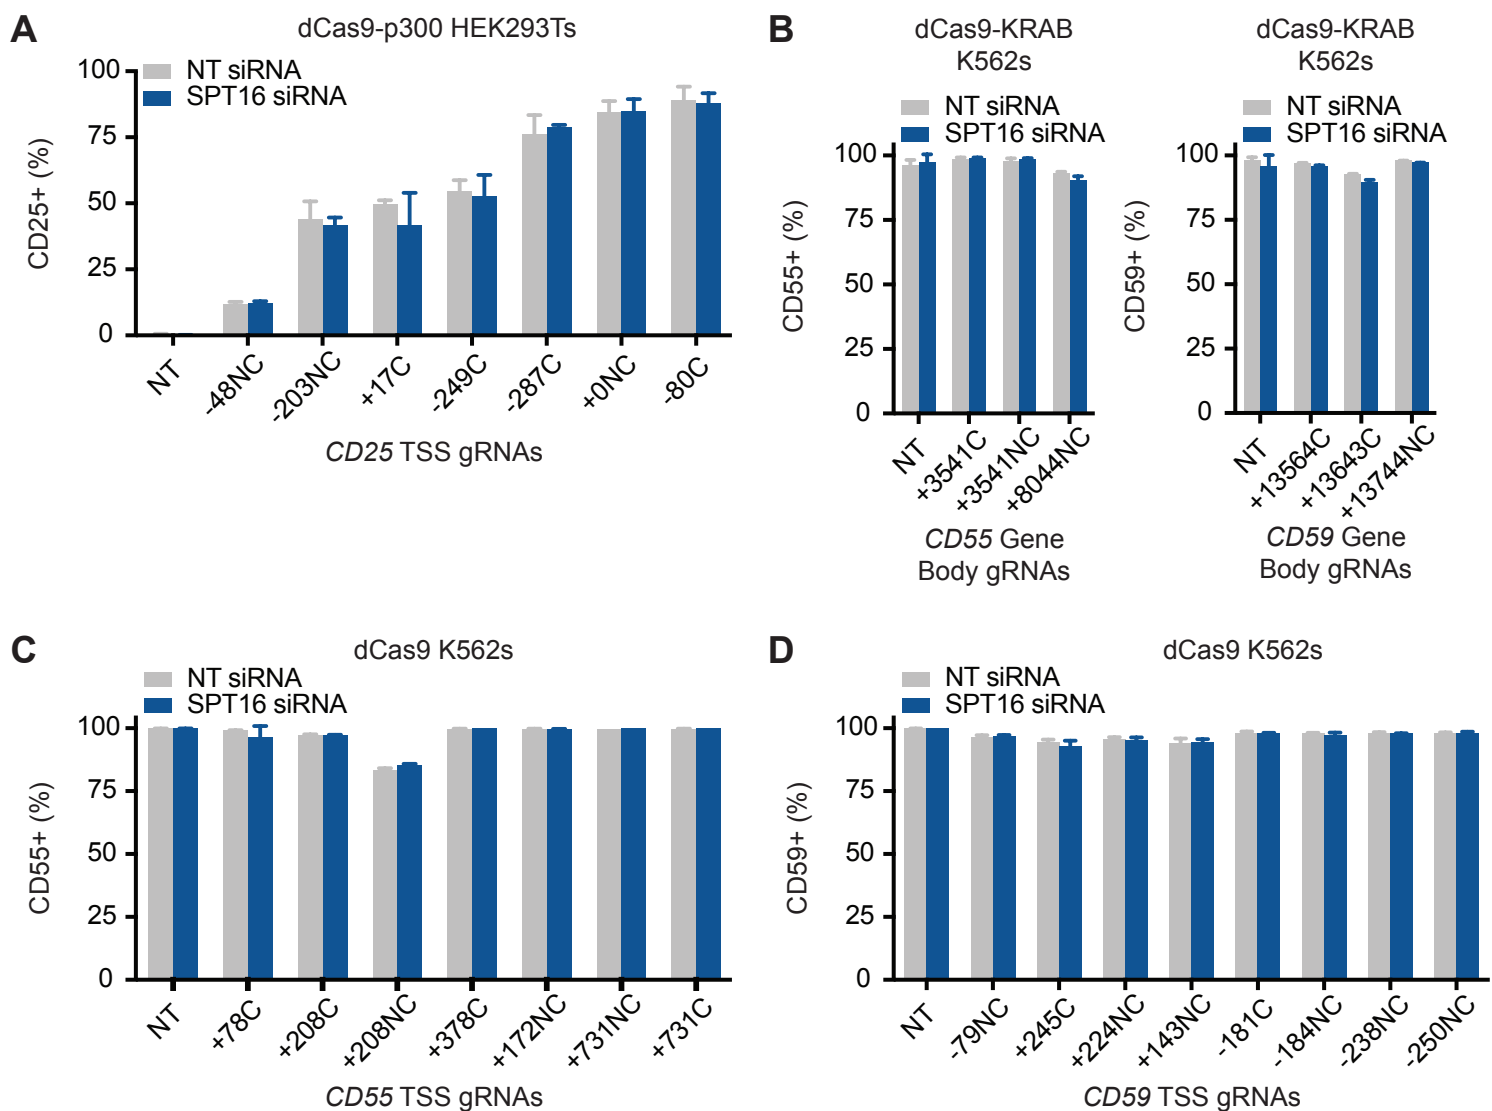

**Figure S5. Enhancement of Transcriptional Engineering After FACT Depletion Requires Localizing KRAB Domain to TSSs, Related to Figure 5**

(A) FACT depletion does not affect *CD25* expression in HEK293T dCas9-p300 cells expressing *CD25* TSS gRNAs (N = 3 biological replicates). CRISPRa cells were stained with PE anti-CD25 after transfection of either NT or SPT16 siRNAs. gRNAs are labeled as in Figure 5D. Data are represented as mean  $\pm$  standard deviation.

(B) Knockdown of FACT does not affect *CD55* (left) or *CD59* (right) expression in K562 dCas9-KRAB cells expressing *CD55* or *CD59* gene body gRNAs (N = 3 biological replicates). gRNAs are labeled as in Figure 5D. Data are represented as mean  $\pm$  standard deviation.

(C) Knockdown of FACT does not affect *CD55* expression in K562 dCas9 cells expressing *CD55* TSS gRNAs (N = 3 biological replicates). gRNAs are labeled as in Figure 5D. Data are represented as mean  $\pm$  standard deviation.

(D) Knockdown of FACT does not affect *CD59* expression in K562 dCas9 cells expressing *CD59* TSS gRNAs (N = 3 biological replicates). gRNAs are labeled as in Figure 5D. Data are represented as mean  $\pm$  standard deviation.



### dCas9-p300 HEK293Ts - CD25 Levels

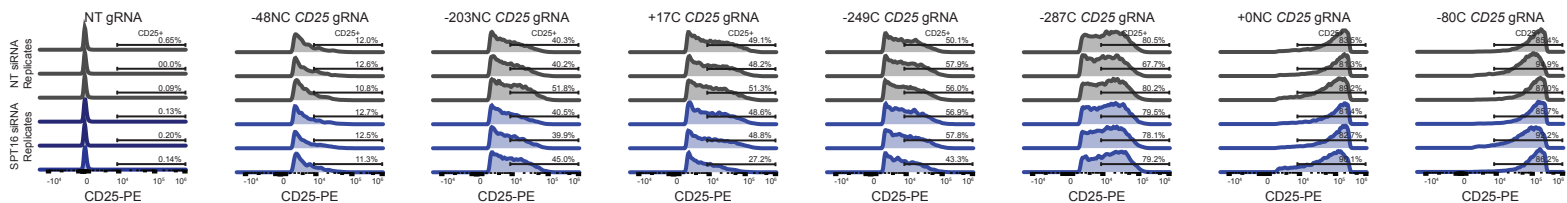

### dCas9-KRAB K562s - CD55 Levels

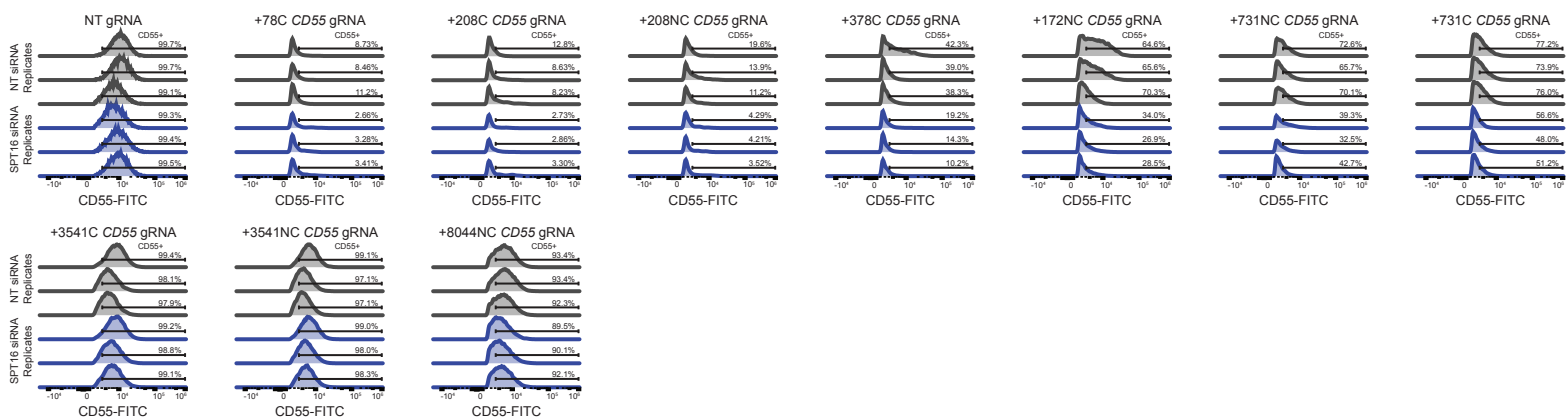

### dCas9-KRAB K562s - CD59 Levels

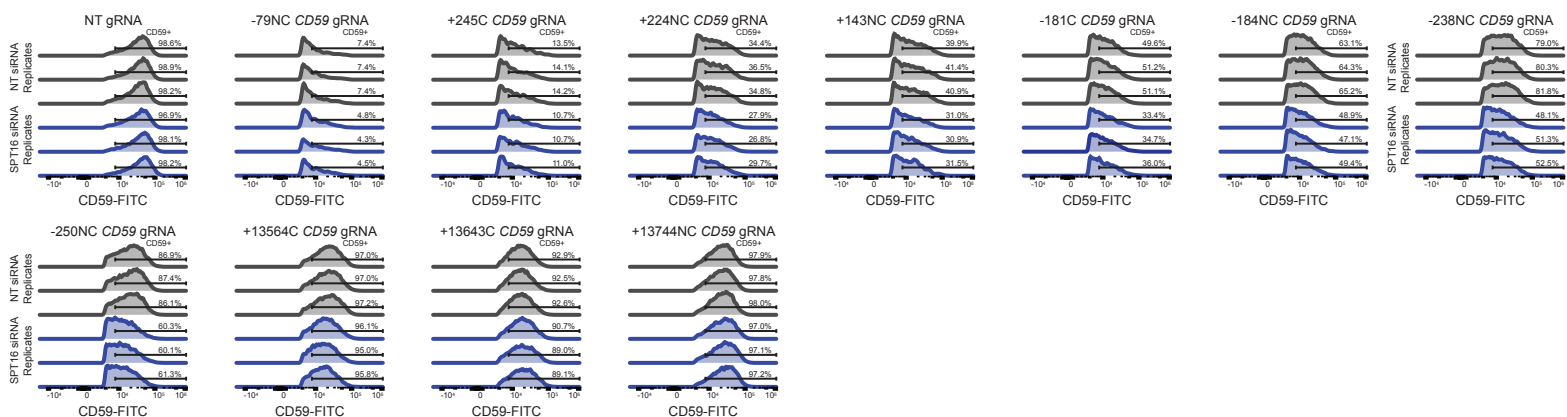

### dCas9 K562s - CD55 Levels

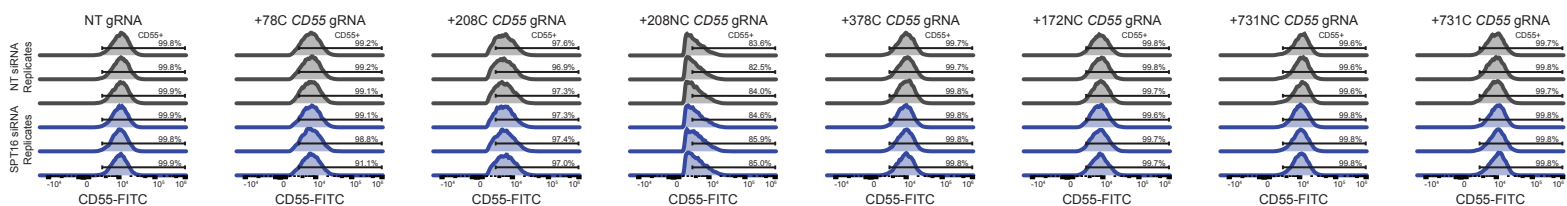

### dCas9 K562s - CD59 Levels

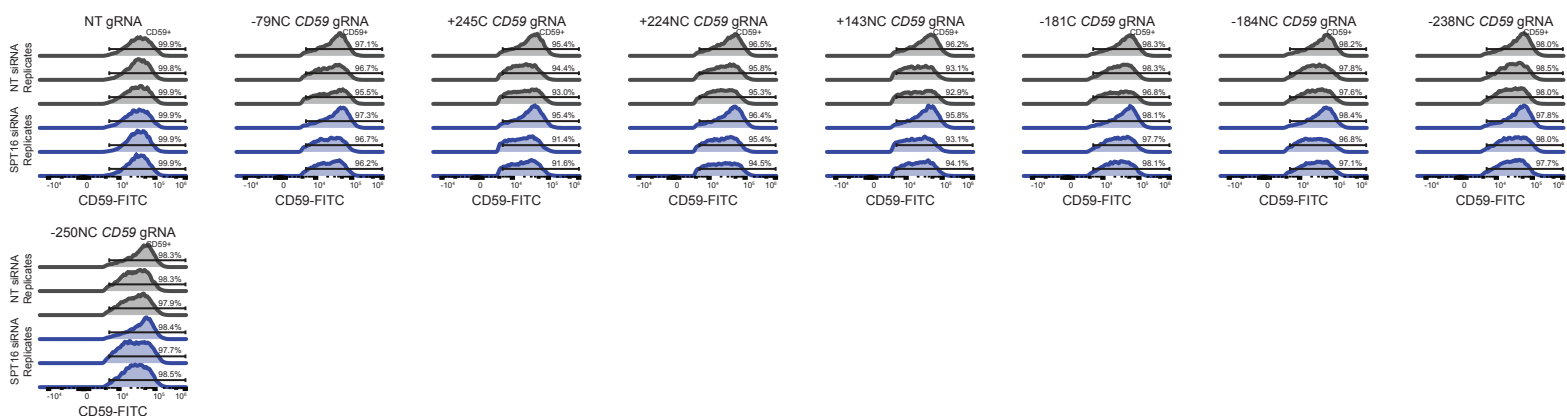

Figure S6. Histograms of CD25, CD55, and CD59 Levels After SPT16 Knockdown, Related to Figure 5

Cas9-BirA\*:

MDYKDHDGDYKDHDIDYKDDDDKMAPKKKRKVGIHGVPAAADKKYSIGLDIGTNSVGWAVITDE  
YKVPSSKFKVLGNTDRHSIKKNLIGALLFDSGETAEATRLKRTARRRYTRRKNRICYLQEIFSNE  
MAKVDDSSFFHRLEESFLVEEDKKHERHPIFGNIVDEVAYHEKYPTIYHLRKKLVDSTDKADLRLI  
YLALAHMIKFRGHFLIEGDLNPDNSDVKLFIQLVQTYNQLFEENPINASGVDAKAILSARLSKSR  
RLENLIAQLPGEKKNGLFGNLIASLGLTPNFKSNFDLAEDAQLQSKDQTYDDDLNLLAQIGDQ  
YADLFLAAKNLSDAILLSDILRVNTEITKAPLSASMIKRYDEHHQDLTLLKALVRQQLPEKYKEIFF  
DQSKNGYAGYIDGGASQEEFYKFIKPILEKMDGTEELLVKLNREDLLRKQRTFDNGSIPHQIHLG  
ELHAILRRQEDFYFPLKDNREKIEKILTFRIPYYVGPLARGNSRFAWMTRKSEETITPWNFEEVV  
DKGASAQSFIERMTNFDKNLPNEKVLPHKSLLYEYFTVYNELTKVKYVTEGMRKPAFLSGEQK  
KAIVDLLFKTNRKVTVKQLKEDYFKKIECFDSVEISGVEDRFNASLGTYHDLLKIIKDKDFLDNEE  
NEDILEDIVLTLTLFEDREMIEERLKYAHLFDDKVMKQLKRRRYTGWGRLSRKLINGIRDKQSG  
KTILDFLKSDGFANRNFMLIHDDSLTFKEDIQKAQVSGQGDSLHEHIANLAGSPAIKKGIQTVK  
VVDELVKVMGRHKPENIVIAMARENQTTQKGQKNSRERMKRIEEGIKELGSQILKEHPVENTQL  
QNEKLYLYYLQNGRDMYVDQELDINRLSDYDVDHIVPQSFLKDDSIDNKVLTRSDKNRGKSDN  
VPSEEVVKKMKNYWRQLLNAKLITQRKFDNLTKAERGGELSELDKAGFIKRLVETRQITKHVAQ  
ILDSTRMNTKYDENDKLIREVKVITLKSCLVSDFRKDFQFYKREINNYHHAHDAYLNAVVG TALIK  
KYPKLESEFVYGDYKVDVRKMIKSEQEIGKATAKYFFYSNIMNFFKTEITLANGEIRKRPLIET  
NGETGEIVWDKGRDFATVRKVL SMPQVNIVKKTEVQTGGFSKESILPKRNSDKLIARKKDWDP  
KKYGGFDSPTVAYSVLVAKVEKGKSKLKSVELLGITIMERSSEKPNIDFLEAKGYKEVKKD  
LIIKLPKYSLFELENGRKRMLASAGELQKGNELALPSKYVNFYLYLASHYEKLGSPEDNEQKQLF  
VEQHKHYLDEIIEQISEFSKRVLADANLDKVL SAYNKHARDKPIREQAENIIHLFTLTNLGAPAAFK  
YFDTTIDRKRYTSTKEVLDATLIHQ SITGLYETRIDLSQLGGDKRPAATKKAGQAKKKKGGGSG  
GGSGGGSKDNTVPLKLIALLANGEFHSGEQLGETLGMSRAAINKHIQTLRDWGVVDVFTVPGKG  
YSLPEPIQLLNAKQILGQLDGGSVAVLPVIDSTNQYLLDRIGELKSGDACIAEYQQAGRGGGRGR  
KWFSPFGANLYLSMFWRL EQGPA AAIGLSLVIGIVMAEVLRLKLGADKVRVKWPNDLYLQDRKL  
AGILVELTGKTGDA AQIVIGAGINMAMRRVEESV V NQGWITLQEAGINLDRNTLAAMLIRELRAA  
LELFEQEGLAPYLSRWEKLDNFINRPVKLIIGDKEIFGISRGIDKQGALLEQDGIIPWMMGGEISL  
RSAEKAYPYDVPDYA\*

dCas9-BirA\*:

MDYKDHDGDYKDHDIDYKDDDDKMAPKKKRKVGIHGVPAAADKKYSIGLAIGTNSVGWAVITDE  
YKVPSSKFKVLGNTDRHSIKKNLIGALLFDSGETAEATRLKRTARRRYTRRKNRICYLQEIFSNE  
MAKVDDSSFFHRLEESFLVEEDKKHERHPIFGNIVDEVAYHEKYPTIYHLRKKLVDSTDKADLRLI  
YLALAHMIKFRGHFLIEGDLNPDNSDVKLFIQLVQTYNQLFEENPINASGVDAKAILSARLSKSR  
RLENLIAQLPGEKKNGLFGNLIASLGLTPNFKSNFDLAEDAQLQSKDQTYDDDLNLLAQIGDQ  
YADLFLAAKNLSDAILLSDILRVNTEITKAPLSASMIKRYDEHHQDLTLLKALVRQQLPEKYKEIFF  
DQSKNGYAGYIDGGASQEEFYKFIKPILEKMDGTEELLVKLNREDLLRKQRTFDNGSIPHQIHLG  
ELHAILRRQEDFYFPLKDNREKIEKILTFRIPYYVGPLARGNSRFAWMTRKSEETITPWNFEEVV  
DKGASAQSFIERMTNFDKNLPNEKVLPHKSLLYEYFTVYNELTKVKYVTEGMRKPAFLSGEQK  
KAIVDLLFKTNRKVTVKQLKEDYFKKIECFDSVEISGVEDRFNASLGTYHDLLKIIKDKDFLDNEE  
NEDILEDIVLTLTLFEDREMIEERLKYAHLFDDKVMKQLKRRRYTGWGRLSRKLINGIRDKQSG  
KTILDFLKSDGFANRNFMLIHDDSLTFKEDIQKAQVSGQGDSLHEHIANLAGSPAIKKGIQTVK  
VVDELVKVMGRHKPENIVIAMARENQTTQKGQKNSRERMKRIEEGIKELGSQILKEHPVENTQL  
QNEKLYLYYLQNGRDMYVDQELDINRLSDYDVAIVPQSFLKDDSIDNKVLTRSDKNRGKSDN  
VPSEEVVKKMKNYWRQLLNAKLITQRKFDNLTKAERGGELSELDKAGFIKRLVETRQITKHVAQ  
ILDSTRMNTKYDENDKLIREVKVITLKSCLVSDFRKDFQFYKREINNYHHAHDAYLNAVVG TALIK  
KYPKLESEFVYGDYKVDVRKMIKSEQEIGKATAKYFFYSNIMNFFKTEITLANGEIRKRPLIET  
NGETGEIVWDKGRDFATVRKVL SMPQVNIVKKTEVQTGGFSKESILPKRNSDKLIARKKDWDP

KKYGGFDSPTVAYSVLVAKVEKGKSKKLKSVKELLGITIMERSSEFEKNPIDFLEAKGYKEVKKD  
LIIKLPKYSLFELENGRKRMLASAGELQKGNELALPSKYVNFLYLASHYEKLGSPEDNEQKQLF  
VEQHKHYLDEIIEQISEFSKRVLADANLDKVL SAYNKHRDKPIREQAENIIHLFTLTNLGAPAAFK  
YFDTTIDRKRYTSTKEVL DATLIHQ SITGLYETRIDLSQLGGDKRPAATKKAGQAKKKKGGGSG  
GGSGGGSKDNTVPLKLIALLANGEFHSGEQLGETLGMSRAAINKHIQTLRDWGVDFVFTVPGKG  
YSLPEPIQLLNAKQILGQLDGGSVAVLPVIDSTNQYLLDRIGELKSGDACIAEYQQAGRGRGR  
KWFSPFGANLYLSMFWRLEQQPAAAIGLSLVIGIVMAEVLRLKLGADKVRVKWPNDLYLQDRKL  
AGILVELTGKTGDAAQIVIGAGINMAMRRVEESVNVNQG WITLQEAGINLDRNTLAAMLIRELRAA  
LELFEQEGLAPYLSRWEKLDNF INRPVKLIIGDKEIFGISRGIDKQGALLLEQDGIIPWMMGGEISL  
RSAEKAYPYDVPDYA\*

**Data S1. Amino Acid Sequences of Cas9-BirA\* and dCas9-BirA\*, Related to Figure 2**

## Supplemental Tables

| gRNA                | Sequence              |
|---------------------|-----------------------|
| TetO                | TCTCTATCACTGATAGGGAG  |
| Chr5 Gene Desert #1 | CCAGAAATTAAGTGTACCTG  |
| Chr5 Gene Desert #2 | GAAGGTCAGACATTAATGTG  |
| CD55 #1             | GCTGACTTGGCTTTAGGGGT  |
| CD55 #2             | AATGCCCAGCCAGCTTTGGA  |
| VEGFA               | GACCCCCTCCACCCCGCCTC  |
| CD59 #1             | TTCTCAGAACCTGGGCCAGG  |
| CD59 #2             | GGCCCAGGTTCTGAGAAGGC  |
| c-myc               | GCGTCCTGGGAAGGGAGATC  |
| Non-coding CD25     | TTGGGCTGGCGTGTTTCAGCC |
| Coding CD25         | CACAAGGGTGACAGCCCAGG  |
| Non-coding CD55     | TCCAAAGCTGGCTGGGCATT  |
| Coding CD55         | AATGCCCAGCCAGCTTTGGA  |
| Non-targeting       | ACGGAGGCTAAGCGTCGCAA  |
| CD25 -48NC          | TTGGGCTGGCGTGTTTCAGCC |
| CD25 -203NC         | GTGGGCTGGGGTTGATGAGA  |
| CD25 +17C           | CACAAGGGTGACAGCCCAGG  |
| CD25 -249C          | TTATGGGCGTAGCTGAAGAA  |
| CD25 -287C          | CACCCTACCTTCAACGGCAG  |
| CD25 +0NC           | TGGGTCCATCCAGTCTCTAT  |
| CD25 -80C           | AGATGAGAGAAGAGAGTGCT  |
| CD55 +78C           | GGCGCGCCATGACCGTCGCG  |
| CD55 +208C          | GGGAAGCCCCTGGGCTGGGT  |
| CD55 +208NC         | GGGAAGCCCCTGGGCTGGGT  |
| CD55 +378C          | GCTGACTTGGCTTTAGGGGT  |
| CD55 +172NC         | ACTCACCCACACGGCCGGC   |
| CD55 +731NC         | TCCAAAGCTGGCTGGGCATT  |
| CD55 +731C          | AATGCCCAGCCAGCTTTGGA  |
| CD55 +3541C         | GCTTCTTGGAAGGCTGAGGC  |
| CD55 +3541NC        | GCCTCAGCCTTCCAAGAAGC  |
| CD55 +8044NC        | GCTACAAGGGAGGCTGAGGT  |
| CD59 -79NC          | CAGGATGCCCTTGCCCTCCC  |
| CD59 +245C          | TATCTACGAGGAAGGAGAAA  |
| CD59 +224NC         | AATGAAGCCAGCGTTCGGCT  |
| CD59 +143NC         | GGTCGAGTGGAAAGCGAGGA  |
| CD59 -181C          | TTCTCAGAACCTGGGCCAGG  |

|               |                      |
|---------------|----------------------|
| CD59 -184NC   | GGCCCAGGTTCTGAGAAGGC |
| CD59 -238NC   | CCCAGGGAACTGAAAGTTTG |
| CD59 -250NC   | AAAGTTTGGGGCGTCCTCCT |
| CD59 +13564C  | TCAGACCAAAGGGGTGACTC |
| CD59 +13643C  | GTTCCCACTCTACTGGCCCC |
| CD59 +13744NC | CAGTGTGGTAGTACACACTG |

**Table S2. Sequences of gRNAs, Related to Figures 3, 4, and 5**

| ssODN               | Sequence                                                                                                                     |
|---------------------|------------------------------------------------------------------------------------------------------------------------------|
| Chr5 Gene Desert #1 | CATTTAAATCTCTCTACATGAAAAGATAATTGCTCCAGAAATTAAC<br>TGTACCTGGAATTCATTCATTTGGTCATGGCTAGTTTCTTATGTAG<br>TGATGATTTGATATCAGAGCTAA  |
| Chr5 Gene Desert #2 | TATCAGAGCTAATTAAGATCGGGTCAGAGTTGGTGAAGGTCAGAC<br>ATTAATGTGTAAGATCATTGAAATGATAATTATAAACAGATTAGGA<br>AGCCACGGTCCTTTATAAGGGGTT  |
| CD55 #1             | CCAGCATTTGGGGCTCCTGCTGTGTCTGGCCCCCAGCTGACTTGG<br>CTTTAGGGGTAGACGTGGAGGGTTAAAGAGGCCCCCGGCTGGGTT<br>TGCGGAGCAGCCAAGCCTGGCAAATC |
| CD55 #2             | CCTAGGTGACTGTGGCCTTCCCCCAGATGTACCTAATGCCCAGC<br>CAGCTTTGGAAAGCCGTACAAGTTTTCCCGAGGATACTGTAATAA<br>CGTACAAATGTGAAGAAAGCTTTGTG  |
| VEGFA               | GGACGAAAAGTTTCAGTGCGACGCCGCGAGCCCCGACCCCTC<br>CACCCCGCCACCTGGCGCGGGCTCCGGCCCTGCCCGCGGCTC<br>GCCGCCGCGTCCACTGTCCGCCGCGGCC     |
| CD59 #1             | TTGAAGGTGCTCATTGGGTCTGGCCACCCGGCCTTCTCAGAAC<br>CTGGGCCAGGATTCTGAGCTCCGCGCGGGGGTGGAGGGAGAGG<br>AGGAGGTTCTGCCGAGGTGCGGCTGCG    |
| CD59 #2             | TCTCCCTCCACCCCGCGCGGAGCTCAGCCTCCTGGCCCAGGTT<br>CTGAGAAGGCCTTGTGGCCAGGACCCAATGAGCACCTTCAAAC<br>CCCAGGGAAGTCAAAGTTTGGGGCGTC    |
| c-myc               | GTGGAAGAGCCGGGCGAGCAGAGCTGCGCTGCGGGCGTCCTG<br>GGAAGGGAGATCAAAGCGAATAGGGGGCTTCGCCTCTGGCCC<br>AGCCCTCCCGCTGATCCCCCAGCCAGCGGT   |

**Table S3. Sequences of ssODN HDR Donors, Related to Figure 4**

|                          |                                     |
|--------------------------|-------------------------------------|
| Chr5 Gene Desert gRNA #1 |                                     |
| PCR #1 - Forward Primer  | GACTACCTGCCACATCGTTAC               |
| PCR #1 - Reverse Primer  | GAGGAAGGAATACTCTCACC                |
| PCR #2 - Forward Primer  | gctctccgatctGACTGTGGAGCCCTGCCTTTG   |
| PCR #2 - Reverse Primer  | gctctccgatctCCCCTTATAAAGGACCGTGCC   |
| Chr5 Gene Desert gRNA #2 |                                     |
| PCR #1 - Forward Primer  | GACTGTGGAGCCCTGCCTTTG               |
| PCR #1 - Reverse Primer  | CCATCATTGTCCACAGGACAGC              |
| PCR #2 - Forward Primer  | gctctccgatctGGGTTCATTCATTTGGTCATGGC |
| PCR #2 - Reverse Primer  | gctctccgatctGGGCTGGAGCTACCATTCTAC   |
| CD55 gRNA #1             |                                     |
| PCR #1 - Forward Primer  | AGGTCCAAGTCGGTCTCTGAG               |
| PCR #1 - Reverse Primer  | GGAGACAAAAGCAGAACTGAAGG             |
| PCR #2 - Forward Primer  | gctctccgatctCCGCCGTCTGTGCCTTTAAG    |
| PCR #2 - Reverse Primer  | gctctccgatctCCACACGGCTGGACTCTGTC    |
| CD55 gRNA #2             |                                     |
| PCR #1 - Forward Primer  | CCACTCTCGACAGAGTCCAGC               |
| PCR #1 - Reverse Primer  | GTGACGTGCCAACAGGGTATAC              |
| PCR #2 - Forward Primer  | gctctccgatctGCAACTGTGAGGACACTTGATAG |
| PCR #2 - Reverse Primer  | gctctccgatctCAATATCTGACCATTGACTGCCC |
| VEGFA                    |                                     |
| PCR #1 - Forward Primer  | GAGGTAGCAAGAGCTCCAGAGAG             |
| PCR #1 - Reverse Primer  | CTGGAGCACTGTCTGCGCACA               |
| PCR #2 - Forward Primer  | gctctccgatctTGACGGACAGACAGACAGACAC  |
| PCR #2 - Reverse Primer  | gctctccgatctGGCCCGAGCTAGCACTTCTC    |
| CD59 gRNA #1             |                                     |
| PCR #1 - Forward Primer  | GTAGGAAGCAGCTTCAGACTGC              |
| PCR #1 - Reverse Primer  | CTCGGCTCGGCTCACCCAAAC               |
| PCR #2 - Forward Primer  | gctctccgatctGCAAATCCGAGGAGGACGCC    |
| PCR #2 - Reverse Primer  | gctctccgatctCATTCTTTCGCTCCAGCCCGCA  |
| CD59 gRNA #2             |                                     |
| PCR #1 - Forward Primer  | GAAGCAGCTTCAGACTGCAGC               |
| PCR #1 - Reverse Primer  | GCCTTCGGGCCTTCTTACCTG               |
| PCR #2 - Forward Primer  | gctctccgatctATGTCCCATAGCAAATCCGAGG  |
| PCR #2 - Reverse Primer  | gctctccgatctCCCGCATTCTTTCGCTCCAGC   |
| c-myc gRNA               |                                     |
| PCR #1 - Forward Primer  | CCCTTTATAATGCGAGGGTCTG              |
| PCR #1 - Reverse Primer  | AATCCAGCGTCTAAGCAGCTGC              |
| PCR #2 - Forward Primer  | gctctccgatctGGGCTTTATCTAACTCGCTGTAG |

|                         |                                    |
|-------------------------|------------------------------------|
| PCR #2 - Reverse Primer | gctctccgatctTGCTATGGGCAAAGTTTCGTGG |
|-------------------------|------------------------------------|

**Table S4. Sequences of Amplicon-NGS PCR Primers, Related to Figure 4**



|                                           |                          |
|-------------------------------------------|--------------------------|
| Template CD25 gRNA                        |                          |
| Upstream of Protospacer - Forward Primer  | CTTCTCATCAACCCCAGCCC     |
| Upstream of Protospacer - Reverse Primer  | CCTAGCACTCTCTTCTCTCATCTC |
| Inclusive of Protospacer - Forward Primer | GAGATGAGAGAAGAGAGTGCTAG  |
| Inclusive of Protospacer - Reverse Primer | ACCCTTGTGGGTCCATCCAG     |
| Non-Template CD25 gRNA                    |                          |
| Upstream of Protospacer - Forward Primer  | CTTCCCATCCCACATCCTCC     |
| Upstream of Protospacer - Reverse Primer  | CCCACATCAGCAGGTATGAATCC  |
| Inclusive of Protospacer - Forward Primer | GAGAGCAACTCCTGACTCCG     |
| Inclusive of Protospacer - Reverse Primer | CTTTCTCTGCAGAAGGCCCA     |
| CD55 gRNAs                                |                          |
| Upstream of Protospacer - Forward Primer  | CCACTCTCGACAGAGTCCAG     |
| Upstream of Protospacer - Reverse Primer  | CAAGTGTCTCACAGTTGCTG     |
| Inclusive of Protospacer - Forward Primer | CCTAGGTGACTGTGGCCTTC     |
| Inclusive of Protospacer - Reverse Primer | GGCAGATCACTGAGTCCTTCTC   |
| Reference (c-myc)                         |                          |
| Forward Primer                            | GCCGCATCCACGAACTTTG      |
| Reverse Primer                            | GCAAGGAGAGCCTTTCAGAGAAG  |

**Table S5. Sequences of qPCR Primers for Chromatin Immunoprecipitation, Related to Figure 5**
